# Supplementary material for: A Comparative Study of Multiparametric MRI Sequences in Measuring Prostate Cancer Index Lesion Volume
Source: PubMed Central journal article supplement (PMC9650977; doi:10.5334/jbsr.2832), 2022-11-10
Supplement: jbsr-106-1-2832-s1.pdf [file jbsr-106-1-2832-s1.pdf]

**Table S1.** The detailed prostate multi-parametric magnetic resonance imaging parameters.

| Sequences                     | TSE T2-weighted imaging |         |          | Diffusion-weighted imaging | T1-weighted dynamic contrast-enhanced imaging |
|-------------------------------|-------------------------|---------|----------|----------------------------|-----------------------------------------------|
|                               | Plane                   | Axial   | Sagittal |                            |                                               |
| TR (msec)                     | 5500                    | 5040    | 3900     | 4800                       | 4.81                                          |
| TE (msec)                     | 104                     | 115     | 117      | 63                         | 1.74                                          |
| Time of acquisition (minutes) | 3.21                    | 2.33    | 3.05     | 4.02                       | 2.52                                          |
| FOV (mm)                      | 200                     | 220     | 240      | 200                        | 260                                           |
| Slice thickness (mm)          | 3                       | 3       | 3        | 3                          | 3                                             |
| b-values (s/mm <sup>2</sup> ) | -                       | -       | -        | 0, 50, 500, 1000           | -                                             |
| Matrix size                   | 384x307                 | 384x288 | 448x291  | 114x88                     | 192x138                                       |

TSE: Turbo spin-echo; TR: Repetition time; TE: Echo time; FOV: Field of view.
